# Supplementary material for: Multiplex CRISPR/Cas screen in regenerating haploid limbs of chimeric Axolotls
Source: eLife. 2020 Jan 28;9:e48511. doi: 10.7554/eLife.48511 (PMC6986871; doi:10.7554/eLife.48511)
Supplement: Figure 2—source data 1. [file elife-48511-fig2-data1.xlsx]

## Sheet: Sheet1
Stage	Number of grafts performed	viable	Impure Limb	Limb with neural GFP only
21-25	30	13	11	2
26-29	30	10	10	0
30-34	30	16	16	0
