# Supplementary material for: Multiplex CRISPR/Cas screen in regenerating haploid limbs of chimeric Axolotls
Source: eLife. 2020 Jan 28;9:e48511. doi: 10.7554/eLife.48511 (PMC6986871; doi:10.7554/eLife.48511)
Supplement: Figure 4—source data 1. [file elife-48511-fig4-data1.xlsx]

## Sheet: fetub
Raw compressed	a		b		c		d		e		f		g		h		i		j		k		l
46to65: GCGCTTGTATCCCTTGCCGCTAGCGCCGGG
47to60TC: CGCTTGTATCCCTTATCCCCGTGCCGCTAG
49to59: CTTGTATCCCTTAGCCCCGTGCCGCTAGCG														66
49to60: CTTGTATCCCTTAGCCCCGTGCCGCTAGCG
49to70: GCTTGTATCCCTTAGCTAGCGCCGGGAGAG
50to63: TTGTATCCCTTAGCAGTGCCGCTAGCGCCG
51to56: TGTATCCCTTAGCAAAGCCCCGTGCCGCTA						3	2		5	4	48	226	2
52to60: GTATCCCTTAGCAACCCCGTGCCGCTAGCG						58
53to64: TATCCCTTAGCAACGTGCCGCTAGCGCCGG	217								2		35	109	3
54to59GTAT: CTTAGCAACGCGTATCCCCGTGCCGCTAGC						118
54to62TTGTATCCCTTAGCAAAGCC: AACGCTTGTATCCCTTAGCAAAGCCCGTGC
54to70: ATCCCTTAGCAACGCTAGCGCCGGGAGAGT	101	2
54to78: CCCTTAGCAACGCCGGGAGAGTGCAACGTC							5		7	107	2
55to61: TCCCTTAGCAACGCCCCGTGCCGCTAGCGC	68	3	301	8		150	31	45	55	904	9	8	6	9	1	2	1069							57
56to57: CCCTTAGCAACGCCGAGCCCCGTGCCGCTA							10	200											2
56to69: CCCTTAGCAACGCCGCTAGCGCCGGGAGAG
57to69TAGCC: TAGCAACGCCGTTAGCCGCTAGCGCCGGGA
57to78: CCTTAGCAACGCCGGGAGAGTGCAACGTCA						25												4						9
58CCA: GCAACGCCGTGACCAGCCCCGTGCCGCTAG																			162
58to59: TTAGCAACGCCGTGCCCCGTGCCGCTAGCG
58to60CACTCTC: AACGCCGTGCACTCTCCCCGTGCCGCTAGC									19
58to63CCGTTGCTAAGG: ACGCCGTGCCGTTGCTAAGGGTGCCGCTAG	364		2	17			10		2	2
58to63GTATTAGA: AGCAACGCCGTGGTATTAGAGTGCCGCTAG			191
58to66: CTTAGCAACGCCGTGCCGCTAGCGCCGGGA	3632	13	1551	24		40	154	454	46	343	57	266	55	383	3	3	646	1143	266
58to66T: TTAGCAACGCCGTGTCGCTAGCGCCGGGAG							3	3
58to108: CTTAGCAACGCCGTGGGGCTGCTCCTGGAA
59insG: GCAACGCCGTGAGGCCCCGTGCCGCTAGCG									42	572			12	690
60to110: TTAGCAACGCCGTGAGGCTGCTCCTGGAAG																	267	170
60to74AGT: TTAGCAACGCCGTGAGAGTGCCGGGAGAGT																	10
60to76AGTGCAA: ACGCCGTGAGAGTGCAACGGGAGAGTGCAA	325						2
60to82: TAGCAACGCCGTGAGAGTGCAACGTCACCG			106	16
wt	69725	1142	94888	3316	77356	96437	11421	53159	8934	88532	13790	71371	10821	99605	30175	222086	25492	41993	26391	48068	7647	6535	5032	16172
	74432	1160	97039	3381	77356	96831	11639	53861	9112	90464	13941	71980	10899	100753	30179	222092	27485	43311	26821	48068	7647	6535	5032	16238
	0.134351	8.62069	0.103051	2.9577	0.129272	0.103273	0.85918	0.185663	1.09745	0.110541	0.717309	0.138927	0.917515	0.0992526	0.331356	0.0450264	0.363835	0.230888	0.372842	0.208039	1.3077	1.53022	1.98728	0.615839
normalized
46to65: GCGCTTGTATCCCTTGCCGCTAGCGCCGGG	0	0	0	0	0	0	0	0	0	0	0	0	0	0	0	0	0	0	0	0	0	0	0	0
47to60TC: CGCTTGTATCCCTTATCCCCGTGCCGCTAG	0	0	0	0	0	0	0	0	0	0	0	0	0	0	0	0	0	0	0	0	0	0	0	0
49to59: CTTGTATCCCTTAGCCCCGTGCCGCTAGCG	0	0	0	0	0	0	0	0	0	0	0	0	0	6.55067	21.8695	0	0	0	0	0	0	0	0	0
49to60: CTTGTATCCCTTAGCCCCGTGCCGCTAGCG	0	0	0	0	0	0	0	0	0	0	0	0	0	0	0	0	0	0	0	0	0	0	0	0
49to70: GCTTGTATCCCTTAGCTAGCGCCGGGAGAG	0	0	0	0	0	0	0	0	0	0	0	0	0	0	0	0	0	0	0	0	0	0	0	0
50to63: TTGTATCCCTTAGCAGTGCCGCTAGCGCCG	0	0	0	0	0	0	0	0	0	0	0	0	0	0	0	0	0	0	0	0	0	0	0	0
51to56: TGTATCCCTTAGCAAAGCCCCGTGCCGCTA	0	0	0	0	0	0.309818	1.71836	0	5.48727	0.442165	34.4308	31.3976	1.83503	0	0	0	0	0	0	0	0	0	0	0
52to60: GTATCCCTTAGCAACCCCGTGCCGCTAGCG	0	0	0	0	0	5.98982	0	0	0	0	0	0	0	0	0	0	0	0	0	0	0	0	0	0
53to64: TATCCCTTAGCAACGTGCCGCTAGCGCCGG	29.1541	0	0	0	0	0	0	0	2.19491	0	25.1058	15.1431	2.75255	0	0	0	0	0	0	0	0	0	0	0
54to59GTAT: CTTAGCAACGCGTATCCCCGTGCCGCTAGC	0	0	0	0	0	12.1862	0	0	0	0	0	0	0	0	0	0	0	0	0	0	0	0	0	0
54to62TTGTATCCCTTAGCAAAGCC: AACGCTTGTATCCCTTAGCAAAGCCCGTGC	0	0	0	0	0	0	0	0	0	0	0	0	0	0	0	0	0	0	0	0	0	0	0	0
54to70: ATCCCTTAGCAACGCTAGCGCCGGGAGAGT	13.5694	17.2414	0	0	0	0	0	0	0	0	0	0	0	0	0	0	0	0	0	0	0	0	0	0
54to78: CCCTTAGCAACGCCGGGAGAGTGCAACGTC	0	0	0	0	0	0	4.2959	0	7.68218	11.8279	1.43462	0	0	0	0	0	0	0	0	0	0	0	0	0
55to61: TCCCTTAGCAACGCCCCGTGCCGCTAGCGC	9.13586	25.8621	31.0185	23.6616	0	15.4909	26.6346	8.35484	60.36	99.9293	6.45578	1.11142	5.50509	0.893274	2.98221	0.0900528	388.939	0	0	0	0	0	0	35.1028
56to57: CCCTTAGCAACGCCGAGCCCCGTGCCGCTA	0	0	0	0	0	0	8.5918	37.1326	0	0	0	0	0	0	0	0	0	0	0.745684	0	0	0	0	0
56to69: CCCTTAGCAACGCCGCTAGCGCCGGGAGAG	0	0	0	0	0	0	0	0	0	0	0	0	0	0	0	0	0	0	0	0	0	0	0	0
57to69TAGCC: TAGCAACGCCGTTAGCCGCTAGCGCCGGGA	0	0	0	0	0	0	0	0	0	0	0	0	0	0	0	0	0	0	0	0	0	0	0	0
57to78: CCTTAGCAACGCCGGGAGAGTGCAACGTCA	0	0	0	0	0	2.58182	0	0	0	0	0	0	0	0	0	0	0	0.923553	0	0	0	0	0	5.54255
58CCA: GCAACGCCGTGACCAGCCCCGTGCCGCTAG	0	0	0	0	0	0	0	0	0	0	0	0	0	0	0	0	0	0	60.4004	0	0	0	0	0
58to59: TTAGCAACGCCGTGCCCCGTGCCGCTAGCG	0	0	0	0	0	0	0	0	0	0	0	0	0	0	0	0	0	0	0	0	0	0	0	0
58to60CACTCTC: AACGCCGTGCACTCTCCCCGTGCCGCTAGC	0	0	0	0	0	0	0	0	20.8516	0	0	0	0	0	0	0	0	0	0	0	0	0	0	0
58to63CCGTTGCTAAGG: ACGCCGTGCCGTTGCTAAGGGTGCCGCTAG	48.9037	0	0.206103	50.281	0	0	8.5918	0	2.19491	0.221082	0	0	0	0	0	0	0	0	0	0	0	0	0	0
58to63GTATTAGA: AGCAACGCCGTGGTATTAGAGTGCCGCTAG	0	0	19.6828	0	0	0	0	0	0	0	0	0	0	0	0	0	0	0	0	0	0	0	0	0
58to66: CTTAGCAACGCCGTGCCGCTAGCGCCGGGA	487.962	112.069	159.833	70.9849	0	4.13091	132.314	84.291	50.4829	37.9156	40.8866	36.9547	50.4633	38.0138	126.909	0.135079	235.037	263.905	99.176	0	0	0	0	0
58to66T: TTAGCAACGCCGTGTCGCTAGCGCCGGGAG	0	0	0	0	0	0	2.57754	0.556989	0	0	0	0	0	0	0	0	0	0	0	0	0	0	0	0
58to108: CTTAGCAACGCCGTGGGGCTGCTCCTGGAA	0	0	0	0	0	0	0	0	0	0	0	0	0	0	0	0	0	0	0	0	0	0	0	0
59insG: GCAACGCCGTGAGGCCCCGTGCCGCTAGCG	0	0	0	0	0	0	0	0	46.0931	63.2296	0	0	11.0102	68.4843	228.636	0	0	0	0	0	0	0	0	0
60to110: TTAGCAACGCCGTGAGGCTGCTCCTGGAAG	0	0	0	0	0	0	0	0	0	0	0	0	0	0	0	0	97.1439	39.251	0	0	0	0	0	0
60to74AGT: TTAGCAACGCCGTGAGAGTGCCGGGAGAGT	0	0	0	0	0	0	0	0	0	0	0	0	0	0	0	0	3.63835	0	0	0	0	0	0	0
60to76AGTGCAA: ACGCCGTGAGAGTGCAACGGGAGAGTGCAA	43.664	0	0	0	0	0	1.71836	0	0	0	0	0	0	0	0	0	0	0	0	0	0	0	0	0
60to82: TAGCAACGCCGTGAGAGTGCAACGTCACCG	0	0	10.9234	47.3233	0	0	0	0	0	0	0	0	0	0	0	0	0	0	0	0	0	0	0	0
wt	9367.61	9844.83	9778.34	9807.75	10000	9959.31	9812.7	9869.66	9804.65	9786.43	9891.69	9915.39	9928.43	9886.06	33004.7	9999.73	9274.88	9695.69	9839.68	10000	10000	10000	10000	9959.35
log
46to65: GCGCTTGTATCCCTTGCCGCTAGCGCCGGG	0	0	0	0	0	0	0	0	0	0	0	0	0	0	0	0	0	0	0	0	0	0	0	0
47to60TC: CGCTTGTATCCCTTATCCCCGTGCCGCTAG	0	0	0	0	0	0	0	0	0	0	0	0	0	0	0	0	0	0	0	0	0	0	0	0
49to59: CTTGTATCCCTTAGCCCCGTGCCGCTAGCG	0	0	0	0	0	0	0	0	0	0	0	0	0	2.91661	4.51535	0	0	0	0	0	0	0	0	0
49to60: CTTGTATCCCTTAGCCCCGTGCCGCTAGCG	0	0	0	0	0	0	0	0	0	0	0	0	0	0	0	0	0	0	0	0	0	0	0	0
49to70: GCTTGTATCCCTTAGCTAGCGCCGGGAGAG	0	0	0	0	0	0	0	0	0	0	0	0	0	0	0	0	0	0	0	0	0	0	0	0
50to63: TTGTATCCCTTAGCAGTGCCGCTAGCGCCG	0	0	0	0	0	0	0	0	0	0	0	0	0	0	0	0	0	0	0	0	0	0	0	0
51to56: TGTATCCCTTAGCAAAGCCCCGTGCCGCTA	0	0	0	0	0	0.389367	1.44274	0	2.69761	0.528236	5.14693	5.01782	1.50336	0	0	0	0	0	0	0	0	0	0	0
52to60: GTATCCCTTAGCAACCCCGTGCCGCTAGCG	0	0	0	0	0	2.80525	0	0	0	0	0	0	0	0	0	0	0	0	0	0	0	0	0	0
53to64: TATCCCTTAGCAACGTGCCGCTAGCGCCGG	4.91428	0	0	0	0	0	0	0	1.67577	0	4.7063	4.01285	1.90787	0	0	0	0	0	0	0	0	0	0	0
54to59GTAT: CTTAGCAACGCGTATCCCCGTGCCGCTAGC	0	0	0	0	0	3.72095	0	0	0	0	0	0	0	0	0	0	0	0	0	0	0	0	0	0
54to62TTGTATCCCTTAGCAAAGCC: AACGCTTGTATCCCTTAGCAAAGCCCGTGC	0	0	0	0	0	0	0	0	0	0	0	0	0	0	0	0	0	0	0	0	0	0	0	0
54to70: ATCCCTTAGCAACGCTAGCGCCGGGAGAGT	3.86487	4.18914	0	0	0	0	0	0	0	0	0	0	0	0	0	0	0	0	0	0	0	0	0	0
54to78: CCCTTAGCAACGCCGGGAGAGTGCAACGTC	0	0	0	0	0	0	2.40488	0	3.11806	3.68121	1.2837	0	0	0	0	0	0	0	0	0	0	0	0	0
55to61: TCCCTTAGCAACGCCCCGTGCCGCTAGCGC	3.3414	4.7475	5.00083	4.6242	0	4.0436	4.7884	3.22571	5.93923	6.6572	2.89836	1.07821	2.70157	0.920883	1.99357	0.124398	8.60711	0	0	0	0	0	0	5.17404
56to57: CCCTTAGCAACGCCGAGCCCCGTGCCGCTA	0	0	0	0	0	0	3.2618	5.25295	0	0	0	0	0	0	0	0	0	0	0.803793	0	0	0	0	0
56to69: CCCTTAGCAACGCCGCTAGCGCCGGGAGAG	0	0	0	0	0	0	0	0	0	0	0	0	0	0	0	0	0	0	0	0	0	0	0	0
57to69TAGCC: TAGCAACGCCGTTAGCCGCTAGCGCCGGGA	0	0	0	0	0	0	0	0	0	0	0	0	0	0	0	0	0	0	0	0	0	0	0	0
57to78: CCTTAGCAACGCCGGGAGAGTGCAACGTCA	0	0	0	0	0	1.84069	0	0	0	0	0	0	0	0	0	0	0	0.943774	0	0	0	0	0	2.70985
58CCA: GCAACGCCGTGACCAGCCCCGTGCCGCTAG	0	0	0	0	0	0	0	0	0	0	0	0	0	0	0	0	0	0	5.94018	0	0	0	0	0
58to59: TTAGCAACGCCGTGCCCCGTGCCGCTAGCG	0	0	0	0	0	0	0	0	0	0	0	0	0	0	0	0	0	0	0	0	0	0	0	0
58to60CACTCTC: AACGCCGTGCACTCTCCCCGTGCCGCTAGC	0	0	0	0	0	0	0	0	4.44967	0	0	0	0	0	0	0	0	0	0	0	0	0	0	0
58to63CCGTTGCTAAGG: ACGCCGTGCCGTTGCTAAGGGTGCCGCTAG	5.64107	0	0.270353	5.68035	0	0	3.2618	0	1.67577	0.288161	0	0	0	0	0	0	0	0	0	0	0	0	0	0
58to63GTATTAGA: AGCAACGCCGTGGTATTAGAGTGCCGCTAG	0	0	4.37036	0	0	0	0	0	0	0	0	0	0	0	0	0	0	0	0	0	0	0	0	0
58to66: CTTAGCAACGCCGTGCCGCTAGCGCCGGGA	8.93358	6.82106	7.32942	6.16962	0	2.35921	7.05868	6.41432	5.68602	5.28228	5.38842	5.24621	5.68547	5.28591	6.99898	0.182793	7.88287	8.04933	6.64639	0	0	0	0	0
58to66T: TTAGCAACGCCGTGTCGCTAGCGCCGGGAG	0	0	0	0	0	0	1.83897	0.638759	0	0	0	0	0	0	0	0	0	0	0	0	0	0	0	0
58to108: CTTAGCAACGCCGTGGGGCTGCTCCTGGAA	0	0	0	0	0	0	0	0	0	0	0	0	0	0	0	0	0	0	0	0	0	0	0	0
59insG: GCAACGCCGTGAGGCCCCGTGCCGCTAGCG	0	0	0	0	0	0	0	0	5.55744	6.00517	0	0	3.58619	6.11862	7.8432	0	0	0	0	0	0	0	0	0
60to110: TTAGCAACGCCGTGAGGCTGCTCCTGGAAG	0	0	0	0	0	0	0	0	0	0	0	0	0	0	0	0	6.61683	5.33095	0	0	0	0	0	0
60to74AGT: TTAGCAACGCCGTGAGAGTGCCGGGAGAGT	0	0	0	0	0	0	0	0	0	0	0	0	0	0	0	0	2.21361	0	0	0	0	0	0	0
60to76AGTGCAA: ACGCCGTGAGAGTGCAACGGGAGAGTGCAA	5.48104	0	0	0	0	0	1.44274	0	0	0	0	0	0	0	0	0	0	0	0	0	0	0	0	0
60to82: TAGCAACGCCGTGAGAGTGCAACGTCACCG	0	0	3.57573	5.59465	0	0	0	0	0	0	0	0	0	0	0	0	0	0	0	0	0	0	0	0
wt	13.1936	13.2653	13.2555	13.2599	13.2879	13.282	13.2606	13.2689	13.2594	13.2567	13.2721	13.2756	13.2775	13.2713	15.0104	13.2878	13.1793	13.2433	13.2645	13.2879	13.2879	13.2879	13.2879	13.282
all
51to56: TGTATCCCTTAGCAAAGCCCCGTGCCGCTA	0	0.389367
56to57: CCCTTAGCAACGCCGAGCCCCGTGCCGCTA	0.803793	0
57to78: CCTTAGCAACGCCGGGAGAGTGCAACGTCA	0	0.943774
54to78: CCCTTAGCAACGCCGGGAGAGTGCAACGTC	1.2837	0
51to56: TGTATCCCTTAGCAAAGCCCCGTGCCGCTA	1.44274	0
60to76AGTGCAA: ACGCCGTGAGAGTGCAACGGGAGAGTGCAA	1.44274	0
51to56: TGTATCCCTTAGCAAAGCCCCGTGCCGCTA	1.50336	0
53to64: TATCCCTTAGCAACGTGCCGCTAGCGCCGG	1.67577	0
57to78: CCTTAGCAACGCCGGGAGAGTGCAACGTCA	0	1.84069
53to64: TATCCCTTAGCAACGTGCCGCTAGCGCCGG	1.90787	0
58to63CCGTTGCTAAGG: ACGCCGTGCCGTTGCTAAGGGTGCCGCTAG	1.67577	0.288161
55to61: TCCCTTAGCAACGCCCCGTGCCGCTAGCGC	1.99357	0.124398
60to74AGT: TTAGCAACGCCGTGAGAGTGCCGGGAGAGT	2.21361	0
58to66: CTTAGCAACGCCGTGCCGCTAGCGCCGGGA	0	2.35921
54to78: CCCTTAGCAACGCCGGGAGAGTGCAACGTC	2.40488	0
58to66T: TTAGCAACGCCGTGTCGCTAGCGCCGGGAG	1.83897	0.638759
57to78: CCTTAGCAACGCCGGGAGAGTGCAACGTCA	0	2.70985
52to60: GTATCCCTTAGCAACCCCGTGCCGCTAGCG	0	2.80525
49to59: CTTGTATCCCTTAGCCCCGTGCCGCTAGCG	0	2.91661
51to56: TGTATCCCTTAGCAAAGCCCCGTGCCGCTA	2.69761	0.528236
58to63CCGTTGCTAAGG: ACGCCGTGCCGTTGCTAAGGGTGCCGCTAG	3.2618	0
55to61: TCCCTTAGCAACGCCCCGTGCCGCTAGCGC	2.70157	0.920883
54to59GTAT: CTTAGCAACGCGTATCCCCGTGCCGCTAGC	0	3.72095
55to61: TCCCTTAGCAACGCCCCGTGCCGCTAGCGC	2.89836	1.07821
55to61: TCCCTTAGCAACGCCCCGTGCCGCTAGCGC	0	4.0436
58to63GTATTAGA: AGCAACGCCGTGGTATTAGAGTGCCGCTAG	4.37036	0
58to60CACTCTC: AACGCCGTGCACTCTCCCCGTGCCGCTAGC	4.44967	0
49to59: CTTGTATCCCTTAGCCCCGTGCCGCTAGCG	4.51535	0
53to64: TATCCCTTAGCAACGTGCCGCTAGCGCCGG	4.91428	0
55to61: TCCCTTAGCAACGCCCCGTGCCGCTAGCGC	0	5.17404
60to76AGTGCAA: ACGCCGTGAGAGTGCAACGGGAGAGTGCAA	5.48104	0
58to63CCGTTGCTAAGG: ACGCCGTGCCGTTGCTAAGGGTGCCGCTAG	5.64107	0
58CCA: GCAACGCCGTGACCAGCCCCGTGCCGCTAG	5.94018	0
58to63CCGTTGCTAAGG: ACGCCGTGCCGTTGCTAAGGGTGCCGCTAG	0.270353	5.68035
58to66: CTTAGCAACGCCGTGCCGCTAGCGCCGGGA	6.64639	0
54to78: CCCTTAGCAACGCCGGGAGAGTGCAACGTC	3.11806	3.68121
58to66: CTTAGCAACGCCGTGCCGCTAGCGCCGGGA	6.99898	0.182793
59insG: GCAACGCCGTGAGGCCCCGTGCCGCTAGCG	7.8432	0
55to61: TCCCTTAGCAACGCCCCGTGCCGCTAGCGC	4.7884	3.22571
54to70: ATCCCTTAGCAACGCTAGCGCCGGGAGAGT	3.86487	4.18914
55to61: TCCCTTAGCAACGCCCCGTGCCGCTAGCGC	3.3414	4.7475
56to57: CCCTTAGCAACGCCGAGCCCCGTGCCGCTA	3.2618	5.25295
55to61: TCCCTTAGCAACGCCCCGTGCCGCTAGCGC	8.60711	0
53to64: TATCCCTTAGCAACGTGCCGCTAGCGCCGG	4.7063	4.01285
60to82: TAGCAACGCCGTGAGAGTGCAACGTCACCG	3.57573	5.59465
55to61: TCCCTTAGCAACGCCCCGTGCCGCTAGCGC	5.00083	4.6242
59insG: GCAACGCCGTGAGGCCCCGTGCCGCTAGCG	3.58619	6.11862
51to56: TGTATCCCTTAGCAAAGCCCCGTGCCGCTA	5.14693	5.01782
58to66: CTTAGCAACGCCGTGCCGCTAGCGCCGGGA	5.38842	5.24621
58to66: CTTAGCAACGCCGTGCCGCTAGCGCCGGGA	5.68602	5.28228
58to66: CTTAGCAACGCCGTGCCGCTAGCGCCGGGA	5.68547	5.28591
59insG: GCAACGCCGTGAGGCCCCGTGCCGCTAGCG	5.55744	6.00517
60to110: TTAGCAACGCCGTGAGGCTGCTCCTGGAAG	6.61683	5.33095
55to61: TCCCTTAGCAACGCCCCGTGCCGCTAGCGC	5.93923	6.6572
58to66: CTTAGCAACGCCGTGCCGCTAGCGCCGGGA	7.05868	6.41432
58to66: CTTAGCAACGCCGTGCCGCTAGCGCCGGGA	7.32942	6.16962
58to66: CTTAGCAACGCCGTGCCGCTAGCGCCGGGA	8.93358	6.82106
58to66: CTTAGCAACGCCGTGCCGCTAGCGCCGGGA	7.88287	8.04933
wt	13.1793	13.2433
wt	13.1936	13.2653
wt	13.2555	13.2599
wt	13.2594	13.2567
wt	13.2606	13.2689
wt	13.2721	13.2756
wt	13.2775	13.2713
wt	13.2645	13.2879
wt	13.2879	13.282
wt	13.2879	13.282
wt	13.2879	13.2879
wt	15.0104	13.2878

## Sheet: msx2
	a
40to51: CTGAGGAAGCACAAGCCCCGCACCCCTTTC	2	5
wt: CACAAGACCAACAGGAAGCCCCGCACCCCT	6254	12596
	6256	12601
	1.59847	0.793588
40to51: CTGAGGAAGCACAAGCCCCGCACCCCTTTC	3.19693	3.96794
wt: CACAAGACCAACAGGAAGCCCCGCACCCCT	9996.8	9996.03
40to51: CTGAGGAAGCACAAGCCCCGCACCCCTTTC	2.06933	2.31265
wt: CACAAGACCAACAGGAAGCCCCGCACCCCT	13.2874	13.2873

## Sheet: myl6
raw compressed	a		b		c		d		e		f		g		h
119to127TCTTTGATAAGGAGTGTACTGA: AAGGTCTTTGATAAGGAGTGTACTGAGCAC	11	12
120to129: GTCTTTGATAAGGAGCACAGTGATGGGTGC			58	11			59	10			59	19	3500	3209
122to128: TCTTTGATAAGGAGGCACAGTGATGGGTGC			2		3	2							102	76	19	77
125to130: TTGATAAGGAGGGCACAGTGATGGGTGCTG	24	5	12	4	32	4	1042	14			489	95	16
wt	10369	1453	15693	8035	13667	288	42154	3401	5638	5464	14262	3304	7651	6518	6067	5534
	10404	1470	15765	8050	13702	294	43255	3425	5638	5464	14810	3418	11269	9803	6086	5611
	0.961169	6.80272	0.634317	1.24224	0.72982	34.0136	0.231187	2.91971	1.77368	1.83016	0.675219	2.92569	0.88739	1.0201	1.64312	1.78221
normalized
119to127TCTTTGATAAGGAGTGTACTGA: AAGGTCTTTGATAAGGAGTGTACTGAGCAC	10.5729	81.6327	0	0	0	0	0	0	0	0	0	0	0	0	0	0
120to129: GTCTTTGATAAGGAGCACAGTGATGGGTGC	0	0	36.7904	13.6646	0	0	13.64	29.1971	0	0	39.8379	55.5881	3105.87	3273.49	0	0
122to128: TCTTTGATAAGGAGGCACAGTGATGGGTGC	0	0	1.26863	0	2.18946	68.0272	0	0	0	0	0	0	90.5138	77.5273	31.2192	137.23
125to130: TTGATAAGGAGGGCACAGTGATGGGTGCTG	23.0681	34.0136	7.6118	4.96894	23.3543	136.054	240.897	40.8759	0	0	330.182	277.94	14.1982	0	0	0
wt	9966.36	9884.35	9954.33	9981.37	9974.46	9795.92	9745.46	9929.93	10000	10000	9629.98	9666.47	6789.42	6648.99	9968.78	9862.77
log
119to127TCTTTGATAAGGAGTGTACTGA: AAGGTCTTTGATAAGGAGTGTACTGAGCAC	3.53267	6.36864	0	0	0	0	0	0	0	0	0	0	0	0	0	0
120to129: GTCTTTGATAAGGAGCACAGTGATGGGTGC	0	0	5.23995	3.87427	0	0	3.87185	4.91634	0	0	5.35184	5.82243	11.6012	11.6771	0	0
122to128: TCTTTGATAAGGAGGCACAGTGATGGGTGC	0	0	1.18182	0	1.67331	6.10909	0	0	0	0	0	0	6.51592	6.29512	5.00985	7.11093
125to130: TTGATAAGGAGGGCACAGTGATGGGTGCTG	4.58905	5.12984	3.10631	2.57748	4.6061	7.09861	7.91825	5.38805	0	0	8.37148	8.12381	3.92583	0	0	0
wt	13.283	13.2711	13.2813	13.2852	13.2842	13.2581	13.2507	13.2777	13.2879	13.2879	13.2335	13.2389	12.7293	12.6991	13.2833	13.2679
all
122to128: TCTTTGATAAGGAGGCACAGTGATGGGTGC	1.18182	0
125to130: TTGATAAGGAGGGCACAGTGATGGGTGCTG	3.92583	0
125to130: TTGATAAGGAGGGCACAGTGATGGGTGCTG	3.10631	2.57748
122to128: TCTTTGATAAGGAGGCACAGTGATGGGTGC	1.67331	6.10909
120to129: GTCTTTGATAAGGAGCACAGTGATGGGTGC	3.87185	4.91634
120to129: GTCTTTGATAAGGAGCACAGTGATGGGTGC	5.23995	3.87427
125to130: TTGATAAGGAGGGCACAGTGATGGGTGCTG	4.58905	5.12984
119to127TCTTTGATAAGGAGTGTACTGA: AAGGTCTTTGATAAGGAGTGTACTGAGCAC	3.53267	6.36864
120to129: GTCTTTGATAAGGAGCACAGTGATGGGTGC	5.35184	5.82243
125to130: TTGATAAGGAGGGCACAGTGATGGGTGCTG	4.6061	7.09861
122to128: TCTTTGATAAGGAGGCACAGTGATGGGTGC	5.00985	7.11093
122to128: TCTTTGATAAGGAGGCACAGTGATGGGTGC	6.51592	6.29512
125to130: TTGATAAGGAGGGCACAGTGATGGGTGCTG	7.91825	5.38805
125to130: TTGATAAGGAGGGCACAGTGATGGGTGCTG	8.37148	8.12381
120to129: GTCTTTGATAAGGAGCACAGTGATGGGTGC	11.6012	11.6771
wt	12.7293	12.6991
wt	13.2335	13.2389
wt	13.2507	13.2777
wt	13.2842	13.2581
wt	13.2833	13.2679
wt	13.283	13.2711
wt	13.2813	13.2852

## Sheet: cacng
raw compressed	a		b		c		d		e		f		g		h		i		j		k
60to82: TCATCTTGGTGGGCATTGACCGACCACTGG															5
63to97: TGCTGGCTGCCGTGGCCGTGCTGAGCCCGC																			15	47
63to100: TTGGTGGGCATCTCCGTGCTGAGCCCGCGC																					2
67to92G: TGGGCATCTCCTTGGCTGGGCCGTGCTGAG													14
69to91: GGGCATCTCCTTGATACTGGGCCGTGCTGA						185
73to84: ATCTCCTTGATGCTGACCGACCACTGGGCC							427
73to105: ATCTCCTTGATGCTGAGCCCGCGCGTCGAG							24
74to96: TCTCCTTGATGCTGGGCCGTGCTGAGCCCG													1								32
75to81: CTCCTTGATGCTGGCGTGACCGACCACTGG							238	182
75to86: CTCCTTGATGCTGGCCGACCACTGGGCCGT											5	9
75to90: CTCCTTGATGCTGGCCACTGGGCCGTGCTG															1						27	31
76to88: TCCTTGATGCTGGCTACCACTGGGCCGTGC															48
77to105: CCTTGATGCTGGCTGAGCCCGCGCGTCGAG			73	32
77to83: CCTTGATGCTGGCTGACCGACCACTGGGCC														3	27	65		5	3
77to95: CCTTGATGCTGGCTGGGCCGTGCTGAGCCC																1					224	13
79to91: TTGATGCTGGCTGCCACTGGGCCGTGCTGA															1						2
80to86: TGATGCTGGCTGCCGACCACTGGGCCGTGC									49	3					9	3
80to111: TGATGCTGGCTGCCGCGCGTCGAGCAGTTC			12
82: ATGCTGGCTGCCGTGTGACCGACCACTGGG									1127	347	3	63			2	3
82to88: ATGCTGGCTGCCGTGACCACTGGGCCGTGC							76	1387
82to102: ATGCTGGCTGCCGTGCTGAGCCCGCGCGTC									10	186	19	63					41	2	1	6
83GCCGTG: GGCTGCCGTGGGCCGTGGACCGACCACTGG																			70	37
83insT: TGGCTGCCGTGGTTGACCGACCACTGGGCC			329	2240	151	271	77										212	1372	201	313	87	5
83to84: TGCTGGCTGCCGTGGACCGACCACTGGGCC														2
83to86G: TGCTGGCTGCCGTGGGCGACCACTGGGCCG			43	23
83to88: TGCTGGCTGCCGTGGACCACTGGGCCGTGC							1899	4098			6						23	22
83to93GCCG: GCTGGCTGCCGTGGGCCGTGGGCCGTGCTG																	3		1231	2503
83to96: GCTGGCTGCCGTGGGCCGTGCTGAGCCCGC									27	5	5	24	54	22					2		6
83to97AT: GCTGGCTGCCGTGGATCCGTGCTGAGCCCG															6	14
84to89: GCTGGCTGCCGTGGTCCACTGGGCCGTGCT
86to103: CTGGCTGCCGTGGTGAGCCCGCGCGTCGAG										2		3					2	1	91
91to93: GCCGTGGTGACCGACTGGGCCGTGCTGAGC
wildtype: GGCTGCCGTGGTGACCGACCACTGGGCCGT	16779	22974	49617	36159	24397	68927	34945	68026	16922	7569	7967	12433	2483	5748	18702	13694	7732	13848	10516	15861	7128	6810
	16779	22974	50074	38454	24548	69383	37686	73693	18135	8112	8005	12595	2552	5775	18801	13780	8013	15250	12130	18767	7508	6859
	0.595983	0.435275	0.199704	0.260051	0.407365	0.144128	0.265351	0.135698	0.55142	1.23274	1.24922	0.793966	3.9185	1.7316	0.531887	0.725689	1.24797	0.655738	0.824402	0.53285	1.33191	1.45794
normalized
60to82: TCATCTTGGTGGGCATTGACCGACCACTGG	0	0	0	0	0	0	0	0	0	0	0	0	0	0	2.65943	0	0	0	0	0	0	0
63to97: TGCTGGCTGCCGTGGCCGTGCTGAGCCCGC	0	0	0	0	0	0	0	0	0	0	0	0	0	0	0	0	0	0	12.366	25.044	0	0
63to100: TTGGTGGGCATCTCCGTGCTGAGCCCGCGC	0	0	0	0	0	0	0	0	0	0	0	0	0	0	0	0	0	0	0	0	2.66383	0
67to92G: TGGGCATCTCCTTGGCTGGGCCGTGCTGAG	0	0	0	0	0	0	0	0	0	0	0	0	54.8589	0	0	0	0	0	0	0	0	0
69to91: GGGCATCTCCTTGATACTGGGCCGTGCTGA	0	0	0	0	0	26.6636	0	0	0	0	0	0	0	0	0	0	0	0	0	0	0	0
73to84: ATCTCCTTGATGCTGACCGACCACTGGGCC	0	0	0	0	0	0	113.305	0	0	0	0	0	0	0	0	0	0	0	0	0	0	0
73to105: ATCTCCTTGATGCTGAGCCCGCGCGTCGAG	0	0	0	0	0	0	6.36841	0	0	0	0	0	0	0	0	0	0	0	0	0	0	0
74to96: TCTCCTTGATGCTGGGCCGTGCTGAGCCCG	0	0	0	0	0	0	0	0	0	0	0	0	3.9185	0	0	0	0	0	0	0	42.6212	0
75to81: CTCCTTGATGCTGGCGTGACCGACCACTGG	0	0	0	0	0	0	63.1534	24.6971	0	0	0	0	0	0	0	0	0	0	0	0	0	0
75to86: CTCCTTGATGCTGGCCGACCACTGGGCCGT	0	0	0	0	0	0	0	0	0	0	6.2461	7.14569	0	0	0	0	0	0	0	0	0	0
75to90: CTCCTTGATGCTGGCCACTGGGCCGTGCTG	0	0	0	0	0	0	0	0	0	0	0	0	0	0	0.531887	0	0	0	0	0	35.9616	45.1961
76to88: TCCTTGATGCTGGCTACCACTGGGCCGTGC	0	0	0	0	0	0	0	0	0	0	0	0	0	0	25.5306	0	0	0	0	0	0	0
77to105: CCTTGATGCTGGCTGAGCCCGCGCGTCGAG	0	0	14.5784	8.32163	0	0	0	0	0	0	0	0	0	0	0	0	0	0	0	0	0	0
77to83: CCTTGATGCTGGCTGACCGACCACTGGGCC	0	0	0	0	0	0	0	0	0	0	0	0	0	5.19481	14.3609	47.1698	0	3.27869	2.47321	0	0	0
77to95: CCTTGATGCTGGCTGGGCCGTGCTGAGCCC	0	0	0	0	0	0	0	0	0	0	0	0	0	0	0	0.725689	0	0	0	0	298.348	18.9532
79to91: TTGATGCTGGCTGCCACTGGGCCGTGCTGA	0	0	0	0	0	0	0	0	0	0	0	0	0	0	0.531887	0	0	0	0	0	2.66383	0
80to86: TGATGCTGGCTGCCGACCACTGGGCCGTGC	0	0	0	0	0	0	0	0	27.0196	3.69822	0	0	0	0	4.78698	2.17707	0	0	0	0	0	0
80to111: TGATGCTGGCTGCCGCGCGTCGAGCAGTTC	0	0	2.39645	0	0	0	0	0	0	0	0	0	0	0	0	0	0	0	0	0	0	0
82: ATGCTGGCTGCCGTGTGACCGACCACTGGG	0	0	0	0	0	0	0	0	621.45	427.761	3.74766	50.0198	0	0	1.06377	2.17707	0	0	0	0	0	0
82to88: ATGCTGGCTGCCGTGACCACTGGGCCGTGC	0	0	0	0	0	0	20.1666	188.213	0	0	0	0	0	0	0	0	0	0	0	0	0	0
82to102: ATGCTGGCTGCCGTGCTGAGCCCGCGCGTC	0	0	0	0	0	0	0	0	5.5142	229.29	23.7352	50.0198	0	0	0	0	51.1669	1.31148	0.824402	3.1971	0	0
83GCCGTG: GGCTGCCGTGGGCCGTGGACCGACCACTGG	0	0	0	0	0	0	0	0	0	0	0	0	0	0	0	0	0	0	57.7082	19.7155	0	0
83insT: TGGCTGCCGTGGTTGACCGACCACTGGGCC	0	0	65.7028	582.514	61.5121	39.0586	20.432	0	0	0	0	0	0	0	0	0	264.57	899.672	165.705	166.782	115.876	7.28969
83to84: TGCTGGCTGCCGTGGACCGACCACTGGGCC	0	0	0	0	0	0	0	0	0	0	0	0	0	3.4632	0	0	0	0	0	0	0	0
83to86G: TGCTGGCTGCCGTGGGCGACCACTGGGCCG	0	0	8.58729	5.98117	0	0	0	0	0	0	0	0	0	0	0	0	0	0	0	0	0	0
83to88: TGCTGGCTGCCGTGGACCACTGGGCCGTGC	0	0	0	0	0	0	503.901	556.091	0	0	7.49532	0	0	0	0	0	28.7034	14.4262	0	0	0	0
83to93GCCG: GCTGGCTGCCGTGGGCCGTGGGCCGTGCTG	0	0	0	0	0	0	0	0	0	0	0	0	0	0	0	0	3.74392	0	1014.84	1333.72	0	0
83to96: GCTGGCTGCCGTGGGCCGTGCTGAGCCCGC	0	0	0	0	0	0	0	0	14.8883	6.16371	6.2461	19.0552	211.599	38.0952	0	0	0	0	1.6488	0	7.99148	0
83to97AT: GCTGGCTGCCGTGGATCCGTGCTGAGCCCG	0	0	0	0	0	0	0	0	0	0	0	0	0	0	3.19132	10.1597	0	0	0	0	0	0
84to89: GCTGGCTGCCGTGGTCCACTGGGCCGTGCT	0	0	0	0	0	0	0	0	0	0	0	0	0	0	0	0	0	0	0	0	0	0
86to103: CTGGCTGCCGTGGTGAGCCCGCGCGTCGAG	0	0	0	0	0	0	0	0	0	2.46548	0	2.3819	0	0	0	0	2.49594	0.655738	75.0206	0	0	0
91to93: GCCGTGGTGACCGACTGGGCCGTGCTGAGC	0	0	0	0	0	0	0	0	0	0	0	0	0	0	0	0	0	0	0	0	0	0
wildtype: GGCTGCCGTGGTGACCGACCACTGGGCCGT	10000	10000	9908.74	9403.18	9938.49	9934.28	9272.67	9231	9331.13	9330.62	9952.53	9871.38	9729.62	9953.25	9947.34	9937.59	9649.32	9080.66	8669.41	8451.54	9493.87	9928.56
60to82: TCATCTTGGTGGGCATTGACCGACCACTGG	0	0	0	0	0	0	0	0	0	0	0	0	0	0	1.87162	0	0	0	0	0	0	0
63to97: TGCTGGCTGCCGTGGCCGTGCTGAGCCCGC	0	0	0	0	0	0	0	0	0	0	0	0	0	0	0	0	0	0	3.7405	4.70288	0	0
63to100: TTGGTGGGCATCTCCGTGCTGAGCCCGCGC	0	0	0	0	0	0	0	0	0	0	0	0	0	0	0	0	0	0	0	0	1.87335	0
67to92G: TGGGCATCTCCTTGGCTGGGCCGTGCTGAG	0	0	0	0	0	0	0	0	0	0	0	0	5.80372	0	0	0	0	0	0	0	0	0
69to91: GGGCATCTCCTTGATACTGGGCCGTGCTGA	0	0	0	0	0	4.78992	0	0	0	0	0	0	0	0	0	0	0	0	0	0	0	0
73to84: ATCTCCTTGATGCTGACCGACCACTGGGCC	0	0	0	0	0	0	6.83674	0	0	0	0	0	0	0	0	0	0	0	0	0	0	0
73to105: ATCTCCTTGATGCTGAGCCCGCGCGTCGAG	0	0	0	0	0	0	2.88135	0	0	0	0	0	0	0	0	0	0	0	0	0	0	0
74to96: TCTCCTTGATGCTGGGCCGTGCTGAGCCCG	0	0	0	0	0	0	0	0	0	0	0	0	2.29822	0	0	0	0	0	0	0	5.44696	0
75to81: CTCCTTGATGCTGGCGTGACCGACCACTGG	0	0	0	0	0	0	6.00345	4.68353	0	0	0	0	0	0	0	0	0	0	0	0	0	0
75to86: CTCCTTGATGCTGGCCGACCACTGGGCCGT	0	0	0	0	0	0	0	0	0	0	2.8572	3.02604	0	0	0	0	0	0	0	0	0	0
75to90: CTCCTTGATGCTGGCCACTGGGCCGTGCTG	0	0	0	0	0	0	0	0	0	0	0	0	0	0	0.61531	0	0	0	0	0	5.20796	5.5297
76to88: TCCTTGATGCTGGCTACCACTGGGCCGTGC	0	0	0	0	0	0	0	0	0	0	0	0	0	0	4.72958	0	0	0	0	0	0	0
77to105: CCTTGATGCTGGCTGAGCCCGCGCGTCGAG	0	0	3.96148	3.22058	0	0	0	0	0	0	0	0	0	0	0	0	0	0	0	0	0	0
77to83: CCTTGATGCTGGCTGACCGACCACTGGGCC	0	0	0	0	0	0	0	0	0	0	0	0	0	2.63106	3.94119	5.59006	0	2.09717	1.79627	0	0	0
77to95: CCTTGATGCTGGCTGGGCCGTGCTGAGCCC	0	0	0	0	0	0	0	0	0	0	0	0	0	0	0	0.787173	0	0	0	0	8.22568	4.31855
79to91: TTGATGCTGGCTGCCACTGGGCCGTGCTGA	0	0	0	0	0	0	0	0	0	0	0	0	0	0	0.61531	0	0	0	0	0	1.87335	0
80to86: TGATGCTGGCTGCCGACCACTGGGCCGTGC	0	0	0	0	0	0	0	0	4.80836	2.23212	0	0	0	0	2.53281	1.6677	0	0	0	0	0	0
80to111: TGATGCTGGCTGCCGCGCGTCGAGCAGTTC	0	0	1.76403	0	0	0	0	0	0	0	0	0	0	0	0	0	0	0	0	0	0	0
82: ATGCTGGCTGCCGTGTGACCGACCACTGGG	0	0	0	0	0	0	0	0	9.28181	8.74403	2.24722	5.67299	0	0	1.04528	1.6677	0	0	0	0	0	0
82to88: ATGCTGGCTGCCGTGACCACTGGGCCGTGC	0	0	0	0	0	0	4.40372	7.56387	0	0	0	0	0	0	0	0	0	0	0	0	0	0
82to102: ATGCTGGCTGCCGTGCTGAGCCCGCGCGTC	0	0	0	0	0	0	0	0	2.70359	7.84731	4.62849	5.67299	0	0	0	0	5.70506	1.20881	0.867424	2.06939	0	0
83GCCGTG: GGCTGCCGTGGGCCGTGGACCGACCACTGG	0	0	0	0	0	0	0	0	0	0	0	0	0	0	0	0	0	0	5.87549	4.37264	0	0
83insT: TGGCTGCCGTGGTTGACCGACCACTGGGCC	0	0	6.05967	9.18862	5.96606	5.32404	4.42169	0	0	0	0	0	0	0	0	0	8.05295	9.81486	7.38115	7.39045	6.86884	3.05132
83to84: TGCTGGCTGCCGTGGACCGACCACTGGGCC	0	0	0	0	0	0	0	0	0	0	0	0	0	2.15808	0	0	0	0	0	0	0	0
83to86G: TGCTGGCTGCCGTGGGCGACCACTGGGCCG	0	0	3.26112	2.80347	0	0	0	0	0	0	0	0	0	0	0	0	0	0	0	0	0	0
83to88: TGCTGGCTGCCGTGGACCACTGGGCCGTGC	0	0	0	0	0	0	8.97986	9.12177	0	0	3.08667	0	0	0	0	0	4.89255	3.94731	0	0	0	0
83to93GCCG: GCTGGCTGCCGTGGGCCGTGGGCCGTGCTG	0	0	0	0	0	0	0	0	0	0	0	0	0	0	0	0	2.24608	0	9.98846	10.3823	0	0
83to96: GCTGGCTGCCGTGGGCCGTGCTGAGCCCGC	0	0	0	0	0	0	0	0	3.9899	2.84071	2.8572	4.3259	7.73199	5.28892	0	0	0	0	1.40534	0	3.16856	0
83to97AT: GCTGGCTGCCGTGGATCCGTGCTGAGCCCG	0	0	0	0	0	0	0	0	0	0	0	0	0	0	2.0674	3.48022	0	0	0	0	0	0
84to89: GCTGGCTGCCGTGGTCCACTGGGCCGTGCT	0	0	0	0	0	0	0	0	0	0	0	0	0	0	0	0	0	0	0	0	0	0
86to103: CTGGCTGCCGTGGTGAGCCCGCGCGTCGAG	0	0	0	0	0	0	0	0	0	1.79306	0	1.75783	0	0	0	0	1.80568	0.727474	6.24832	0	0	0
91to93: GCCGTGGTGACCGACTGGGCCGTGCTGAGC	0	0	0	0	0	0	0	0	0	0	0	0	0	0	0	0	0	0	0	0	0	0
wildtype: GGCTGCCGTGGTGACCGACCACTGGGCCGT	13.2879	13.2879	13.2746	13.1991	13.279	13.2783	13.1789	13.1724	13.188	13.1879	13.281	13.2692	13.2483	13.2811	13.2802	13.2788	13.2364	13.1487	13.0819	13.0452	13.2129	13.2775
75to90: CTCCTTGATGCTGGCCACTGGGCCGTGCTG	0.61531	0
79to91: TTGATGCTGGCTGCCACTGGGCCGTGCTGA	0.61531	0
77to95: CCTTGATGCTGGCTGGGCCGTGCTGAGCCC	0	0.787173
83to96: GCTGGCTGCCGTGGGCCGTGCTGAGCCCGC	1.40534	0
86to103: CTGGCTGCCGTGGTGAGCCCGCGCGTCGAG	0	1.75783
80to111: TGATGCTGGCTGCCGCGCGTCGAGCAGTTC	1.76403	0
86to103: CTGGCTGCCGTGGTGAGCCCGCGCGTCGAG	0	1.79306
77to83: CCTTGATGCTGGCTGACCGACCACTGGGCC	1.79627	0
60to82: TCATCTTGGTGGGCATTGACCGACCACTGG	1.87162	0
63to100: TTGGTGGGCATCTCCGTGCTGAGCCCGCGC	1.87335	0
79to91: TTGATGCTGGCTGCCACTGGGCCGTGCTGA	1.87335	0
77to83: CCTTGATGCTGGCTGACCGACCACTGGGCC	0	2.09717
83to84: TGCTGGCTGCCGTGGACCGACCACTGGGCC	0	2.15808
83to93GCCG: GCTGGCTGCCGTGGGCCGTGGGCCGTGCTG	2.24608	0
74to96: TCTCCTTGATGCTGGGCCGTGCTGAGCCCG	2.29822	0
86to103: CTGGCTGCCGTGGTGAGCCCGCGCGTCGAG	1.80568	0.727474
77to83: CCTTGATGCTGGCTGACCGACCACTGGGCC	0	2.63106
82: ATGCTGGCTGCCGTGTGACCGACCACTGGG	1.04528	1.6677
73to105: ATCTCCTTGATGCTGAGCCCGCGCGTCGAG	2.88135	0
82to102: ATGCTGGCTGCCGTGCTGAGCCCGCGCGTC	0.867424	2.06939
83to88: TGCTGGCTGCCGTGGACCACTGGGCCGTGC	3.08667	0
83to96: GCTGGCTGCCGTGGGCCGTGCTGAGCCCGC	3.16856	0
80to86: TGATGCTGGCTGCCGACCACTGGGCCGTGC	2.53281	1.6677
83insT: TGGCTGCCGTGGTTGACCGACCACTGGGCC	4.42169	0
76to88: TCCTTGATGCTGGCTACCACTGGGCCGTGC	4.72958	0
69to91: GGGCATCTCCTTGATACTGGGCCGTGCTGA	0	4.78992
74to96: TCTCCTTGATGCTGGGCCGTGCTGAGCCCG	5.44696	0
83to97AT: GCTGGCTGCCGTGGATCCGTGCTGAGCCCG	2.0674	3.48022
67to92G: TGGGCATCTCCTTGGCTGGGCCGTGCTGAG	5.80372	0
75to86: CTCCTTGATGCTGGCCGACCACTGGGCCGT	2.8572	3.02604
83to86G: TGCTGGCTGCCGTGGGCGACCACTGGGCCG	3.26112	2.80347
86to103: CTGGCTGCCGTGGTGAGCCCGCGCGTCGAG	6.24832	0
83to96: GCTGGCTGCCGTGGGCCGTGCTGAGCCCGC	3.9899	2.84071
73to84: ATCTCCTTGATGCTGACCGACCACTGGGCC	6.83674	0
82to102: ATGCTGGCTGCCGTGCTGAGCCCGCGCGTC	5.70506	1.20881
80to86: TGATGCTGGCTGCCGACCACTGGGCCGTGC	4.80836	2.23212
77to105: CCTTGATGCTGGCTGAGCCCGCGCGTCGAG	3.96148	3.22058
83to96: GCTGGCTGCCGTGGGCCGTGCTGAGCCCGC	2.8572	4.3259
82: ATGCTGGCTGCCGTGTGACCGACCACTGGG	2.24722	5.67299
63to97: TGCTGGCTGCCGTGGCCGTGCTGAGCCCGC	3.7405	4.70288
83to88: TGCTGGCTGCCGTGGACCACTGGGCCGTGC	4.89255	3.94731
77to83: CCTTGATGCTGGCTGACCGACCACTGGGCC	3.94119	5.59006
83insT: TGGCTGCCGTGGTTGACCGACCACTGGGCC	6.86884	3.05132
83GCCGTG: GGCTGCCGTGGGCCGTGGACCGACCACTGG	5.87549	4.37264
82to102: ATGCTGGCTGCCGTGCTGAGCCCGCGCGTC	4.62849	5.67299
82to102: ATGCTGGCTGCCGTGCTGAGCCCGCGCGTC	2.70359	7.84731
75to81: CTCCTTGATGCTGGCGTGACCGACCACTGG	6.00345	4.68353
75to90: CTCCTTGATGCTGGCCACTGGGCCGTGCTG	5.20796	5.5297
83insT: TGGCTGCCGTGGTTGACCGACCACTGGGCC	5.96606	5.32404
82to88: ATGCTGGCTGCCGTGACCACTGGGCCGTGC	4.40372	7.56387
77to95: CCTTGATGCTGGCTGGGCCGTGCTGAGCCC	8.22568	4.31855
83to96: GCTGGCTGCCGTGGGCCGTGCTGAGCCCGC	7.73199	5.28892
83insT: TGGCTGCCGTGGTTGACCGACCACTGGGCC	7.38115	7.39045
83insT: TGGCTGCCGTGGTTGACCGACCACTGGGCC	6.05967	9.18862
83insT: TGGCTGCCGTGGTTGACCGACCACTGGGCC	8.05295	9.81486
82: ATGCTGGCTGCCGTGTGACCGACCACTGGG	9.28181	8.74403
83to88: TGCTGGCTGCCGTGGACCACTGGGCCGTGC	8.97986	9.12177
83to93GCCG: GCTGGCTGCCGTGGGCCGTGGGCCGTGCTG	9.98846	10.3823
wildtype: GGCTGCCGTGGTGACCGACCACTGGGCCGT	13.0819	13.0452
wildtype: GGCTGCCGTGGTGACCGACCACTGGGCCGT	13.1789	13.1724
wildtype: GGCTGCCGTGGTGACCGACCACTGGGCCGT	13.188	13.1879
wildtype: GGCTGCCGTGGTGACCGACCACTGGGCCGT	13.2364	13.1487
wildtype: GGCTGCCGTGGTGACCGACCACTGGGCCGT	13.2746	13.1991
wildtype: GGCTGCCGTGGTGACCGACCACTGGGCCGT	13.2129	13.2775
wildtype: GGCTGCCGTGGTGACCGACCACTGGGCCGT	13.2483	13.2811
wildtype: GGCTGCCGTGGTGACCGACCACTGGGCCGT	13.281	13.2692
wildtype: GGCTGCCGTGGTGACCGACCACTGGGCCGT	13.279	13.2783
wildtype: GGCTGCCGTGGTGACCGACCACTGGGCCGT	13.2802	13.2788
wildtype: GGCTGCCGTGGTGACCGACCACTGGGCCGT	13.2879	13.2879

## Sheet: tyr
raw compressed	a		b		c
50to67: GAGCGGGAGATCCAGGACTTCACTATCCCC	13
51to56: GCGGGAGATCCAGACCGGCGACCAGGACTT					51	47
55GGG: GATCCAGAAGGTGGGGACCGGCGACCAGGA			44
wt: GAGCGGGAGATCCAGAAGGTGACCGGCGAC	34721	73599	114399	128671	64547	94994
	34734	73599	114443	128671	64598	95041
	0.287902	0.135871	0.0873797	0.0777176	0.154804	0.105218
normalized
50to67: GAGCGGGAGATCCAGGACTTCACTATCCCC	3.74273	0	0	0	0	0
51to56: GCGGGAGATCCAGACCGGCGACCAGGACTT	0	0	0	0	7.89498	4.94523
55GGG: GATCCAGAAGGTGGGGACCGGCGACCAGGA	0	0	3.84471	0	0	0
wt: GAGCGGGAGATCCAGAAGGTGACCGGCGAC	9996.26	10000	9996.16	10000	9992.11	9995.05
log
50to67: GAGCGGGAGATCCAGGACTTCACTATCCCC	2.24572	0	0	0	0	0
51to56: GCGGGAGATCCAGACCGGCGACCAGGACTT	0	0	0	0	3.15299	2.57173
55GGG: GATCCAGAAGGTGGGGACCGGCGACCAGGA	0	0	2.27641	0	0	0
wt: GAGCGGGAGATCCAGAAGGTGACCGGCGAC	13.2873	13.2879	13.2873	13.2879	13.2867	13.2871
50to67: GAGCGGGAGATCCAGGACTTCACTATCCCC	2.24572	0
55GGG: GATCCAGAAGGTGGGGACCGGCGACCAGGA	2.27641	0
51to56: GCGGGAGATCCAGACCGGCGACCAGGACTT	3.15299	2.57173
wt: GAGCGGGAGATCCAGAAGGTGACCGGCGAC	13.2867	13.2871
wt: GAGCGGGAGATCCAGAAGGTGACCGGCGAC	13.2873	13.2879
wt: GAGCGGGAGATCCAGAAGGTGACCGGCGAC	13.2873	13.2879

## Sheet: dsg
raw compressed	a
128to138: GGCTGGGCCCCAAGTGGCAGAAATCTGCAC	2817	2202
wt: GGGCTGGGCCCCAAGTTTAAGACCCTGGCA	122865	196766
	125682	198968
	0.0795659	0.0502593
normalized
128to138: GGCTGGGCCCCAAGTGGCAGAAATCTGCAC	224.137	110.671
wt: GGGCTGGGCCCCAAGTTTAAGACCCTGGCA	9775.86	9889.33
log
128to138: GGCTGGGCCCCAAGTGGCAGAAATCTGCAC	7.81466	6.80311
wt: GGGCTGGGCCCCAAGTTTAAGACCCTGGCA	13.2552	13.2718

## Sheet: zic5
raw	a		b		c		d
26to54: GAGCAGCCACGTCTGGGCCAAGTACAAGCT	8
26to64: GAGCAGCCACGTCTGGGCCAAGTACAAGCT	10
29to51AGCA: GCCACGTCTGAGCAGCAAGCCCTTCAAGGC								32
37to52: TCTGCTTCTGGGAGGGCAAGCCCTTCAAGG				12
39to50: TGCTTCTGGGAGGAGGGCAAGCCCTTCAAG					157	452
39to52: TGCTTCTGGGAGGAGCAAGCCCTTCAAGGC
44to59: CTGGGAGGAGTGCCCTTCAAGGCCAAGTAC			49				2
49to64TGCAG: GAGTGCCCGCGGGTGCAGAGGCCAAGTACA
49to88ins: TCCTCGTGTAGGGTCCGAATGCGTCCAGTG			2
WT	20712	24379	24197	33615	50463	23540	47699	61341
	20730	24379	24248	33627	50620	23992	47701	61373
	0.482393	0.410189	0.412405	0.29738	0.19755	0.416806	0.209639	0.162938
normalized
26to54: GAGCAGCCACGTCTGGGCCAAGTACAAGCT	3.85914	0	0	0	0	0	0	0
26to64: GAGCAGCCACGTCTGGGCCAAGTACAAGCT	4.82393	0	0	0	0	0	0	0
29to51AGCA: GCCACGTCTGAGCAGCAAGCCCTTCAAGGC	0	0	0	0	0	0	0	5.21402
37to52: TCTGCTTCTGGGAGGGCAAGCCCTTCAAGG	0	0	0	3.56856	0	0	0	0
39to50: TGCTTCTGGGAGGAGGGCAAGCCCTTCAAG	0	0	0	0	31.0154	188.396	0	0
39to52: TGCTTCTGGGAGGAGCAAGCCCTTCAAGGC	0	0	0	0	0	0	0	0
44to59: CTGGGAGGAGTGCCCTTCAAGGCCAAGTAC	0	0	20.2079	0	0	0	0.419278	0
49to64TGCAG: GAGTGCCCGCGGGTGCAGAGGCCAAGTACA	0	0	0	0	0	0	0	0
49to88ins: TCCTCGTGTAGGGTCCGAATGCGTCCAGTG	0	0	0.82481	0	0	0	0	0
WT	9991.32	10000	9978.97	9996.43	9968.98	9811.6	9999.58	9994.79
log
26to54: GAGCAGCCACGTCTGGGCCAAGTACAAGCT	2.2807	0	0	0	0	0	0	0
26to64: GAGCAGCCACGTCTGGGCCAAGTACAAGCT	2.54199	0	0	0	0	0	0	0
29to51AGCA: GCCACGTCTGAGCAGCAAGCCCTTCAAGGC	0	0	0	0	0	0	0	2.63553
37to52: TCTGCTTCTGGGAGGGCAAGCCCTTCAAGG	0	0	0	2.19174	0	0	0	0
39to50: TGCTTCTGGGAGGAGGGCAAGCCCTTCAAG	0	0	0	0	5.00069	7.56526	0	0
39to52: TGCTTCTGGGAGGAGCAAGCCCTTCAAGGC	0	0	0	0	0	0	0	0
44to59: CTGGGAGGAGTGCCCTTCAAGGCCAAGTAC	0	0	4.40653	0	0	0	0.505158	0
49to64TGCAG: GAGTGCCCGCGGGTGCAGAGGCCAAGTACA	0	0	0	0	0	0	0	0
49to88ins: TCCTCGTGTAGGGTCCGAATGCGTCCAGTG	0	0	0.867746	0	0	0	0	0
WT	13.2866	13.2879	13.2848	13.2873	13.2834	13.2604	13.2878	13.2871
44to59: CTGGGAGGAGTGCCCTTCAAGGCCAAGTAC	0.505158	0
49to88ins: TCCTCGTGTAGGGTCCGAATGCGTCCAGTG	0.867746	0
37to52: TCTGCTTCTGGGAGGGCAAGCCCTTCAAGG	0	2.19174
26to54: GAGCAGCCACGTCTGGGCCAAGTACAAGCT	2.2807	0
26to64: GAGCAGCCACGTCTGGGCCAAGTACAAGCT	2.54199	0
29to51AGCA: GCCACGTCTGAGCAGCAAGCCCTTCAAGGC	0	2.63553
44to59: CTGGGAGGAGTGCCCTTCAAGGCCAAGTAC	4.40653	0
39to50: TGCTTCTGGGAGGAGGGCAAGCCCTTCAAG	5.00069	7.56526
WT	13.2834	13.2604
WT	13.2848	13.2873
WT	13.2866	13.2879
WT	13.2878	13.2871

## Sheet: akap8l
raw compressed	a		b		c		d		e
24to94ins: ACAACATTCCCTGCCCACCGGTCCGTATGC
68to91: ACAACAGCCAATGGGTTCCCCCCGGCCCCC	3	3	5	8		6	8	10	2	4
76to82: CAATGGGCGGGTGGGCTCTGGTTCCCCCCG
76to84: CAATGGGCGGGTGGGCCTCTGGTTCCCCCC
77to92: AATGGGCGGGTGGGGTTCCCCCCGGCCCCC			8	76
78to87: ATGGGCGGGTGGGGCCCTGGTTCCCCCCGG
83to91: CGGGTGGGGCTCTGGTTCCCCCCGGCCCCC	35	165	93	231		229	48	179	266	7464
83to94tt: CGGGTGGGGCTCTGGTTCCCCCGGCCCCCA									7	49
83to99ins: GGTGCCCCTGGTGCCTCTGGTTCCCCTTGG	12	117	27	166		2592	60	128	4	76
84to92: GGTGGGGCTCTGGCTCCCCCCGGCCCCCAT										14
87to95: TGGGGCTCTGGCGCCCCCCGGCCCCCATCC
wt	2324	24742	9538	26585	15810	74765	2723	31904	1424	18003
	2374	25027	9671	27066	15810	77592	2839	32221	1703	25610
	4.2123	0.399568	1.03402	0.369467	0.632511	0.128879	3.52237	0.310357	5.87199	0.390472
normalized
24to94ins: ACAACATTCCCTGCCCACCGGTCCGTATGC	0	0	0	0	0	0	0	0	0	0
68to91: ACAACAGCCAATGGGTTCCCCCCGGCCCCC	12.6369	1.19871	5.1701	2.95574	0	0.773276	28.1789	3.10357	11.744	1.56189
76to82: CAATGGGCGGGTGGGCTCTGGTTCCCCCCG	0	0	0	0	0	0	0	0	0	0
76to84: CAATGGGCGGGTGGGCCTCTGGTTCCCCCC	0	0	0	0	0	0	0	0	0	0
77to92: AATGGGCGGGTGGGGTTCCCCCCGGCCCCC	0	0	8.27215	28.0795	0	0	0	0	0	0
78to87: ATGGGCGGGTGGGGCCCTGGTTCCCCCCGG	0	0	0	0	0	0	0	0	0	0
83to91: CGGGTGGGGCTCTGGTTCCCCCCGGCCCCC	147.43	65.9288	96.1638	85.3469	0	29.5134	169.074	55.5538	1561.95	2914.49
83to94tt: CGGGTGGGGCTCTGGTTCCCCCGGCCCCCA	0	0	0	0	0	0	0	0	41.1039	19.1332
83to99ins: GGTGCCCCTGGTGCCTCTGGTTCCCCTTGG	50.5476	46.7495	27.9185	61.3316	0	334.055	211.342	39.7256	23.488	29.6759
84to92: GGTGGGGCTCTGGCTCCCCCCGGCCCCCAT	0	0	0	0	0	0	0	0	0	5.46661
87to95: TGGGGCTCTGGCGCCCCCCGGCCCCCATCC	0	0	0	0	0	0	0	0	0	0
wt	9789.39	9886.12	9862.48	9822.29	10000	9635.66	9591.41	9901.62	8361.71	7029.68
log
24to94ins: ACAACATTCCCTGCCCACCGGTCCGTATGC	0	0	0	0	0	0	0	0	0	0
68to91: ACAACAGCCAATGGGTTCCCCCCGGCCCCC	3.76944	1.13665	2.62529	1.98395	0	0.826417	4.86686	2.03688	3.67174	1.35721
76to82: CAATGGGCGGGTGGGCTCTGGTTCCCCCCG	0	0	0	0	0	0	0	0	0	0
76to84: CAATGGGCGGGTGGGCCTCTGGTTCCCCCC	0	0	0	0	0	0	0	0	0	0
77to92: AATGGGCGGGTGGGGTTCCCCCCGGCCCCC	0	0	3.2129	4.86193	0	0	0	0	0	0
78to87: ATGGGCGGGTGGGGCCCTGGTTCCCCCCGG	0	0	0	0	0	0	0	0	0	0
83to91: CGGGTGGGGCTCTGGTTCCCCCCGGCCCCC	7.21364	6.06456	6.60235	6.43207	0	4.93137	7.41002	5.82155	10.6101	11.5095
83to94tt: CGGGTGGGGCTCTGGTTCCCCCGGCCCCCA	0	0	0	0	0	0	0	0	5.39588	4.3315
83to99ins: GGTGCCCCTGGTGCCTCTGGTTCCCCTTGG	5.68783	5.57741	4.85392	5.96189	0	8.38825	7.73025	5.34787	4.614	4.93903
84to92: GGTGGGGCTCTGGCTCCCCCCGGCCCCCAT	0	0	0	0	0	0	0	0	0	2.69301
87to95: TGGGGCTCTGGCGCCCCCCGGCCCCCATCC	0	0	0	0	0	0	0	0	0	0
wt	13.2571	13.2713	13.2679	13.262	13.2879	13.2343	13.2277	13.2736	13.0298	12.7794
all
68to91: ACAACAGCCAATGGGTTCCCCCCGGCCCCC	0	0.826417
84to92: GGTGGGGCTCTGGCTCCCCCCGGCCCCCAT	0	2.69301
68to91: ACAACAGCCAATGGGTTCCCCCCGGCCCCC	2.62529	1.98395
68to91: ACAACAGCCAATGGGTTCCCCCCGGCCCCC	3.76944	1.13665
83to91: CGGGTGGGGCTCTGGTTCCCCCCGGCCCCC	0	4.93137
68to91: ACAACAGCCAATGGGTTCCCCCCGGCCCCC	3.67174	1.35721
68to91: ACAACAGCCAATGGGTTCCCCCCGGCCCCC	4.86686	2.03688
77to92: AATGGGCGGGTGGGGTTCCCCCCGGCCCCC	3.2129	4.86193
83to99ins: GGTGCCCCTGGTGCCTCTGGTTCCCCTTGG	0	8.38825
83to99ins: GGTGCCCCTGGTGCCTCTGGTTCCCCTTGG	4.614	4.93903
83to94tt: CGGGTGGGGCTCTGGTTCCCCCGGCCCCCA	5.39588	4.3315
83to99ins: GGTGCCCCTGGTGCCTCTGGTTCCCCTTGG	4.85392	5.96189
83to99ins: GGTGCCCCTGGTGCCTCTGGTTCCCCTTGG	5.68783	5.57741
83to91: CGGGTGGGGCTCTGGTTCCCCCCGGCCCCC	6.60235	6.43207
83to99ins: GGTGCCCCTGGTGCCTCTGGTTCCCCTTGG	7.73025	5.34787
83to91: CGGGTGGGGCTCTGGTTCCCCCCGGCCCCC	7.41002	5.82155
83to91: CGGGTGGGGCTCTGGTTCCCCCCGGCCCCC	7.21364	6.06456
83to91: CGGGTGGGGCTCTGGTTCCCCCCGGCCCCC	10.6101	11.5095
wt	13.0298	12.7794
wt	13.2277	13.2736
wt	13.2879	13.2343
wt	13.2571	13.2713
wt	13.2679	13.262

## Sheet: hoxb9
raw compressed	a		b
127to133	52	10	2	22
wt	12835	10096	613	8295
	12887	10106	615	8317
	0.775976	0.989511	16.2602	1.20236
normalized
127to133	40.3507	9.89511	32.5203	26.4518
wt	9959.65	9990.1	9967.48	9973.55
log
127to133	5.36984	3.44561	5.06696	4.77883
wt	13.282	13.2864	13.2832	13.284
all
127to133	5.36984	3.44561
wt	13.282	13.2864
127to133	5.06696	4.77883
wt	13.2832	13.284

## Sheet: pmp2
raw compressed	a		b
47to85	1	2	3
wt	29587	48513	12259	19901
	29588	48515	12262	19901
	0.337975	0.206122	0.815528	0.502487
normalized
47to85	0.337975	0.412244	2.44658	0
wt	9999.66	9999.59	9997.55	10000
log
47to85	0.420051	0.497989	1.78517	0
wt	13.2878	13.2878	13.2875	13.2879
all
47to85	0.420051	0.497989
wt	13.2878	13.2878
47to85	1.78517	0
wt	13.2875	13.2879

[truncated: 8 more sheets: etv4, hrnrpa0, hoxb13, hoxc8, rcc, catalase, tyr (control), meth (control)]
