# Supplementary material for: Multiplex CRISPR/Cas screen in regenerating haploid limbs of chimeric Axolotls
Source: eLife. 2020 Jan 28;9:e48511. doi: 10.7554/eLife.48511 (PMC6986871; doi:10.7554/eLife.48511)
Supplement: Figure 6—source data 1. [file elife-48511-fig6-data1.xlsx]

## Sheet: Sheet1
animal #			Days post amputation
	4	6	10	14	18	percent mutant
cat1	835.838	1552.47	2108.71	2222.61	3219.26	100
cat2	292.412	730.594	1839.05	1854.21	2373.92	100
cat3	515.992	982.106	2071.28	2261.38	3108.34	100
cat4	742.316	1337.74	2120.84	2078.97	2840.71	100
cat5	794.937	1291.23	1814.91	2012.68	2399.72	100
cat6	754.037	1220.77	2078.43	2191.34	2655.91	100
cat7	496.789	982.605	1666.48	1667.08	2064.25	100
cat8	730.594	1068.64	1643.1	1863.17	2365.18	85
cat9	584.575	1097.45	1839.82	1862.85	2247.18	100
cat10	648.794	1222.27	1845.44	1914.15	2283.18	96
cat11	187.044	730.594	1563.01	2143.14	2692.53	95
cat12	321.466	807.656	1718.47	2137.76	2829.68	0
cat13	558.401	1111.04	1795.02	1916.43	2358.93	100
cat14	795.561	1322.53	1989.4	2114.64	2770.99	90
cat15	754.037	1348.21	1928.47	1794.61	2079.32	100
cat16	584.575	1110.54	2111.14	2102.75	2600.13	100
cat17	596.172	1194.59	1989.27	2185.16	2692.53	85
fet1	619.739	1103.43	1681.02	1781.46	2197.27	96
fet2	479.444	1017.27	1830.16	2224.83	2644.82	91
fet3	643.058	1111.91	1824.67	2265.53	2831.51	54
fet4	760.022	1215.54	1918.78	1923.6	2292.16	54
fet5	666.376	1127	1846.63	1801.81	1965.65	90
fet6	415.113	829.354	1614.88	1788.62	2034.79	96
fet7	672.236	1136.11	1786.88	2077.96	2322.96	94
fet8	280.192	233.805	1187.38	1705.42	1705.37	96
fet9	841.698	1130.62	1825.95	1864.34	2306.49	87
fet10	602.033	1087.35	2019.02	2228.74	2647.34	89
fet11	485.068	1035.35	2163.3	2358.99	2732.55	81
fet12	455.889	990.46	1780.36	2043.93	2283.26	43
fet13	496.789	1356.69	1998.84	2607.95	3071.26	100
fet14	661.388	1065.78	1937.81	2293.21	2781.93	95
fet15	491.178	1106.55	2041.11	2139.67	2634.17	97
tyr 1	475.466	976.121	1863.96	2333.61	3147.26
tyr2	740.445	1449.59	2560.14	2791.34	3743.49
tyr3	298.148	794.937	1845.44	1918.38	2465.9
tyr4	379.949	981.981	1614.11	1528.49	2141.66
tyr5	672.236	1174.89	1845.82	1923.6	2394.31
ty46	520.232	1057.92	2080.86	2580.75	3083.78
tyr7	829.977	1385.25	2424.61	2614.47	3346
tyr8	701.415	1256.69	2275.54	2612.02	3472.53
tyr9	806.659	1414.55	2204.26	2404.86	3033.84
tyr10	619.615	1116.4	1858.98	2067.57	2723.96
tyr11	385.81	1083.36	1859.62	2247.05	2759.96
tyr 12	602.033	1145.71	2101.17	2440.69	3342.05
tyr13	414.988	917.638	1634.93	1664.32	2138.96
tyr14	578.714	1081.36	1961.81	2184.99	2948.72
tyr15	566.993	1186.61	1846.85	1916.27	2569.33
tyr16	473.471	987.842	2020.95	2267.4	3119.78
