# Supplementary material for: Multiplex CRISPR/Cas screen in regenerating haploid limbs of chimeric Axolotls
Source: eLife. 2020 Jan 28;9:e48511. doi: 10.7554/eLife.48511 (PMC6986871; doi:10.7554/eLife.48511)
Supplement: Supplementary file 1. [file elife-48511-supp1.xlsx]

## Sheet: Primers
Gene target	sgRNA Target Oligo (Target Sequence in all capitals + bold)	m1BC - Limb 1 UMI: Universal adaptor-10N barcode-Gene specific sequence	m2BC Limb 2 UMI: Universal adaptor-10N barcode-Gene specific sequence	Reverse Primer
Msx2	taatacgactcactataGGGGTGCGGGGCTTCCTGTTgttttagagctagaaatagcaag	CTGAATGGCTCACCGGAATGACCAnnnnnnnnnnCATCTGAGCCCATCCACCTGC	ATTAATGGCTCACCGGAATGACCAnnnnnnnnnnCATCTGAGCCCATCCACCTGC	TGCAGTCTCTTAGCCTTGGCCCGGC
Prmt1	taatacgactcactataGgGGAACATGGAGTTGCGGTgttttagagctagaaatagcaag	CTGAATGGCTCACCGGAATGACCAnnnnnnnnnnGAAGAGATGCTGAAAGATGAGGTGC	ATTAATGGCTCACCGGAATGACCAnnnnnnnnnnGAAGAGATGCTGAAAGATGAGGTGC	CCCAATAACTTTCTTAGCACCCGCC
Myl6	taatacgactcactataGgCTTTGATAAGGAGGGCAAgttttagagctagaaatagcaag	CTGAATGGCTCACCGGAATGACCAnnnnnnnnnnTGACCAGTTCCTGCCCATGTTGCA	ATTAATGGCTCACCGGAATGACCAnnnnnnnnnnTGACCAGTTCCTGCCCATGTTGCA	CAGCGACACCAGCACATGC
Fetub	taatacgactcactatagGCTAGCGGCACGGGGCTCAgttttagagctagaaatagcaag	CTGAATGGCTCACCGGAATGACCAnnnnnnnnnnATGAAGCCGCACACAGCCC	ATTAATGGCTCACCGGAATGACCAnnnnnnnnnnATGAAGCCGCACACAGCCC	GGTTGGGTGTAAACGTCGACCAC
HoxC8	taatacgactcactataGGGCGTGCGAGACCTCGATGgttttagagctagaaatagcaag	CTGAATGGCTCACCGGAATGACCAnnnnnnnnnnGCTCCCGGAAGACGCAGCGG	ATTAATGGCTCACCGGAATGACCAnnnnnnnnnnGCTCCCGGAAGACGCAGCGG	GTTGTTCTCCTTCTTCCACTTCATCCTCC
Akap8L	taatacgactcactataGGGTGGGGCTCTGGCGCCTCgttttagagctagaaatagcaag	CTGAATGGCTCACCGGAATGACCAnnnnnnnnnnACAGACCCATGGCGTCGTTTCC	ATTAATGGCTCACCGGAATGACCAnnnnnnnnnnACAGACCCATGGCGTCGTTTCC	GTCTCCGTCCCACACTTTGACGC
Hoxc8	taatacgactcactataGGGACCGCAGGTACGAGGgttttagagctagaaatagcaag	CTGAATGGCTCACCGGAATGACCAnnnnnnnnnnACCCGGCTGCGAACTGGCTGCACG	ATTAATGGCTCACCGGAATGACCAnnnnnnnnnnACCCGGCTGCGAACTGGCTGCACG	CCTTAGGCCGGTCCTTGTTGATTT
Hrnpa0	taatacgactcactataGgGGCGTTCATGGCGGCGTgttttagagctagaaatagcaag	CTGAATGGCTCACCGGAATGACCAnnnnnnnnnnTCAATGTTCAGACGACGGAGCAAGGCCT	ATTAATGGCTCACCGGAATGACCAnnnnnnnnnnTCAATGTTCAGACGACGGAGCAAGGCCT	CCTCTCGGGACACGGCCCG
Hsd17B10	taatacgactcactataGGTTCAACAGGGAGCATGTGgttttagagctagaaatagcaag	CTGAATGGCTCACCGGAATGACCAnnnnnnnnnnGGAATGGTTGGCATCGTTACTGGAG	ATTAATGGCTCACCGGAATGACCAnnnnnnnnnnGGAATGGTTGGCATCGTTACTGGAG	TCAGCAGGGGCGAAAACACACTG
HoxB9	taatacgactcactataGGGTCAGGTACATGTTGAAGgttttagagctagaaatagcaag	CTGAATGGCTCACCGGAATGACCAnnnnnnnnnnTGCACGCCCGCTCCTCCCGCAA	ATTAATGGCTCACCGGAATGACCAnnnnnnnnnnTGCACGCCCGCTCCTCCCGCAA	CTACTCCTTGCCCTGCTCCTTGTTCA
Tyrosinase	taatacgactcactataGGGAGATCCAGAAGGTGACgttttagagctagaaatagcaag	CTGAATGGCTCACCGGAATGACCAnnnnnnnnnnCCTTCCCTGGCACCGGCTC	ATTAATGGCTCACCGGAATGACCAnnnnnnnnnnCCTTCCCTGGCACCGGCTC	CTGCCAAGAAGCGAAGAAGGAGC
Etv4	taatacgactcactataGgCATCTGGGCCCCCTGGTTgttttagagctagaaatagcaag	CTGAATGGCTCACCGGAATGACCAnnnnnnnnnnCCTACGATCAAGCAAGACAGGTT	ATTAATGGCTCACCGGAATGACCAnnnnnnnnnnCCTACGATCAAGCAAGACAGGTT	GTGTTCCATGAGGTATCCCCGAGAG
Cacng1	taatacgactcactataGGCCCAGTGGTCGGTCACCAgttttagagctagaaatagcaag	CTGAATGGCTCACCGGAATGACCAnnnnnnnnnnATGATCGAGAGCAAAGTCGCCAA	ATTAATGGCTCACCGGAATGACCAnnnnnnnnnnATGATCGAGAGCAAAGTCGCCAA	CAGGGTCAGCGGCCCGCAG
Catalase	taatacgactcactataGgGATGGCCCATTTCGACCgttttagagctagaaatagcaag	CTGAATGGCTCACCGGAATGACCAnnnnnnnnnnGAGAAACCGGTACTGACAACTGGAG	ATTAATGGCTCACCGGAATGACCAnnnnnnnnnnGAGAAACCGGTACTGACAACTGGAG	CTGCTCCTTTGGCGTGAACC
Hoxb13	taatacgactcactataGGTCCAGATAGCTGGCCACgttttagagctagaaatagcaag	CTGAATGGCTCACCGGAATGACCAnnnnnnnnnnGGTACTATTCCTGCCGCGTGGC	ATTAATGGCTCACCGGAATGACCAnnnnnnnnnnGGTACTATTCCTGCCGCGTGGC	GGTTATTCCAGCCTCCACCCAGG
Zic5	taatacgactcactataGGGAGGAGTGCCCGGGGAgttttagagctagaaatagcaag	CTGAATGGCTCACCGGAATGACCAnnnnnnnnnnCCTCTTGTGGATCTTGAGGTTCTCG	ATTAATGGCTCACCGGAATGACCAnnnnnnnnnnCCTCTTGTGGATCTTGAGGTTCTCG	TTGCAGTAGTAAGGCTTGTCACTGGTGTG
Ecm1	taatacgactcactataGGGTGGGCGAAGCCTGTCTGgttttagagctagaaatagcaag	CTGAATGGCTCACCGGAATGACCAnnnnnnnnnnGGAGGTTGAACTTGCCAGACTTTCC	ATTAATGGCTCACCGGAATGACCAnnnnnnnnnnGGAGGTTGAACTTGCCAGACTTTCC	GCACAGTTGAGCCGGCCTTG
Cornifelin	taatacgactcactataGGCAAGGTGTCTAAGGACTTgttttagagctagaaatagcaag	CTGAATGGCTCACCGGAATGACCAnnnnnnnnnnCTCTGTGGCACCTTCATACCC	ATTAATGGCTCACCGGAATGACCAnnnnnnnnnnCTCTGTGGCACCTTCATACCC	TTCGATACGCCAACGCTCC
Dsg-like	taatacgactcactataGGGCCCCAAGTTTAAGACCCgttttagagctagaaatagcaag	CTGAATGGCTCACCGGAATGACCAnnnnnnnnnnTGTGTCTGTGGGTATGTTGGGAATG	ATTAATGGCTCACCGGAATGACCAnnnnnnnnnnTGTGTCTGTGGGTATGTTGGGAATG	TGGGAATGACTGTAGTCAAGGATGGTACT
Enpp2	taatacgactcactataGGAGCTTAAATCACCTGCTGgttttagagctagaaatagcaag	CTGAATGGCTCACCGGAATGACCAnnnnnnnnnnTGAGCACCCCAATTCCTCGTTTAGTGT	ATTAATGGCTCACCGGAATGACCAnnnnnnnnnnTGAGCACCCCAATTCCTCGTTTAGTGT	TCTTGTCATCACATGAGCACCC
Fabp2	taatacgactcactataGGTGATCTTCAGGTTGTCATgttttagagctagaaatagcaag	CTGAATGGCTCACCGGAATGACCAnnnnnnnnnnTTATTTCGATGGTCCGGAATGTGCTT	ATTAATGGCTCACCGGAATGACCAnnnnnnnnnnTTATTTCGATGGTCCGGAATGTGCTT	CGAAAGTTCGGTTCCATCTGCCA
Pmp2	taatacgactcactataGgGAAACTCAAAGTCACCATgttttagagctagaaatagcaag	CTGAATGGCTCACCGGAATGACCAnnnnnnnnnnGTTGGCTTTGCCACGAGGAAG	ATTAATGGCTCACCGGAATGACCAnnnnnnnnnnGTTGGCTTTGCCACGAGGAAG	CTTCGTATGCCGGTCGTCTGCT
Kcne1	taatacgactcactataGgACGTATGGAAGGGGTCAGgttttagagctagaaatagcaag	CTGAATGGCTCACCGGAATGACCAnnnnnnnnnnTACGTCCTCCTGCTCCTGGGCTTC	ATTAATGGCTCACCGGAATGACCAnnnnnnnnnnTACGTCCTCCTGCTCCTGGGCTTC	GGTTGCTCGGCAGCAAACTCGTT
Krt6A	taatacgactcactataGGCTCTGcAGAAGaCCAAGCgttttagagctagaaatagcaag	CTGAATGGCTCACCGGAATGACCAnnnnnnnnnnCTTCCGGTAGGTGGCAATCTCAATGT	ATTAATGGCTCACCGGAATGACCAnnnnnnnnnnCTTCCGGTAGGTGGCAATCTCAATGT	CTCCCTCTAGGAGCTTCCGGTAGG
Rcc1	taatacgactcactataGGGAGGGACACCTCAAAGGgttttagagctagaaatagcaag	CTGAATGGCTCACCGGAATGACCAnnnnnnnnnnCCTAGTTTGGAGGAAAGGGGACTAGA	ATTAATGGCTCACCGGAATGACCAnnnnnnnnnnCCTAGTTTGGAGGAAAGGGGACTAGA	TCTGAATGAACCAATAAGAAAGACCCT
Constant Oligo for sgRNA DNA construct synthesis: AAAAGCACCGACTCGGTGCCACTTTTTCAAGTTGATAACGGACTAGCCTTATTTTAACTTGCTATTTCTAGCTCTAAAAC
Limb 1 Universal Adaptor Primers with 4-6 bp barcode
m1BC1	aattCTGAATGGCTCACCGGAATGACCA
m1BC2	aaccCTGAATGGCTCACCGGAATGACCA
m1BC3	aaggCTGAATGGCTCACCGGAATGACCA
m1BC4	ttaaCTGAATGGCTCACCGGAATGACCA
m1BC5	ttggCTGAATGGCTCACCGGAATGACCA
m1BC6	ttccCTGAATGGCTCACCGGAATGACCA
m1BC7	ggccCTGAATGGCTCACCGGAATGACCA
m1BC8	ggttCTGAATGGCTCACCGGAATGACCA
m1BC9	ggaaCTGAATGGCTCACCGGAATGACCA
m1BC10	ccttCTGAATGGCTCACCGGAATGACCA
m1BC11	ccggCTGAATGGCTCACCGGAATGACCA
m1BC12	ccaaCTGAATGGCTCACCGGAATGACCA
m1BC13	atgatgCTGAATGGCTCACCGGAATGACCA
m1BC14	tcatcaCTGAATGGCTCACCGGAATGACCA
Limb 2 Universal Adaptor Primers with 4-6 bp barcode
m2BC1	aattATTAATGGCTCACCGGAATGACCA
m2BC2	aaccATTAATGGCTCACCGGAATGACCA
m2BC3	aaggATTAATGGCTCACCGGAATGACCA
m2BC4	ttaaATTAATGGCTCACCGGAATGACCA
m2BC5	ttggATTAATGGCTCACCGGAATGACCA
m2BC6	ttccATTAATGGCTCACCGGAATGACCA
m2BC7	ggccATTAATGGCTCACCGGAATGACCA
m2BC8	ggttATTAATGGCTCACCGGAATGACCA
m2BC9	ggaaATTAATGGCTCACCGGAATGACCA
m2BC10	ccttATTAATGGCTCACCGGAATGACCA
m2BC11	ccggATTAATGGCTCACCGGAATGACCA
m2BC12	ccaaATTAATGGCTCACCGGAATGACCA
m2BC13	atgatgATTAATGGCTCACCGGAATGACCA
m2BC14	tcatcaATTAATGGCTCACCGGAATGACCA

## Sheet: Genes targeted
Genes targeted
Msx2
Prmt1
Myl6
Fetub
HoxC8
Akap8L
Hoxc8
Hrnpa0
Hsd17B10
Hoxb9
Tyrosinase
Etv4
Cacng1
Catalase
Hoxb13
Zic5
Ecm1
Cornifelin
Dsg-like
Enpp2
Fabp2
Pmp2
Kcne1
Krt6A
Rcc1
